# Supplementary material for: Intranasal dantrolene nanoparticles inhibit lipopolysaccharide-induced depression and anxiety behavior in mice
Source: Research Square preprint supplement (doi:10.21203/rs.3.rs-6254774/v1), 2025-04-03
Supplement: Supplementary file [file d322b2b79699ee7b0ffd3928.pdf]

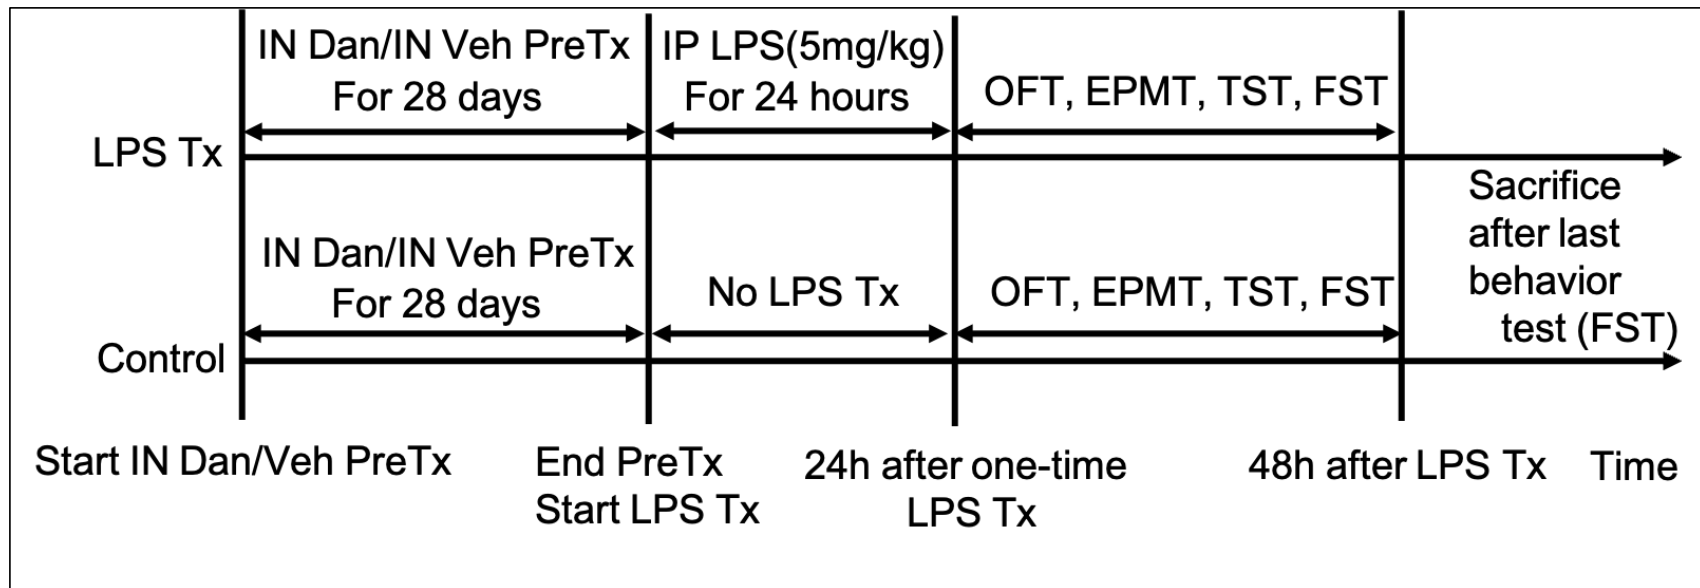

**Supplemental figure 1. Experimental Design.** Adult B6SJLF1/J mice were pretreated with intranasal dantrolene nanoparticles in Ryanodex formulation (DNRF, 5mg/kg) or vehicle (Veh) for 4 weeks. Control group received no treatments. Mice were then treated with intraperitoneal (IP) injection of lipopolysaccharide (LPS, 5mg/kg) for one time. Depression and anxiety behavior tests were performed at 24 hours after one-time IP LPS injection. PreTX: Pretreatment, Tx: Treatment, IN: Intranasal, Dan: Dantrolene, OFT: Open Field Test, EPMT: Elevated Plus Maze Test, TST: Tail Suspension Test, FST: Forced Swimming Test

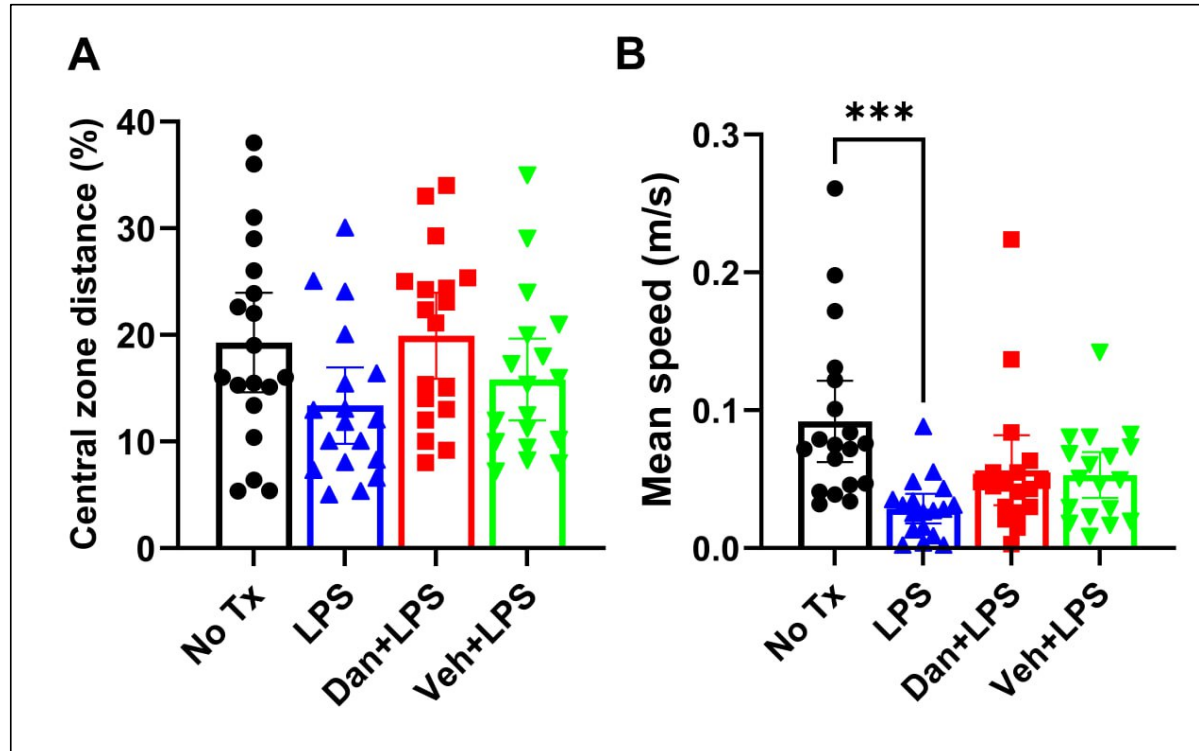

**Supplemental figure 2. Effects of intranasal dantrolene nanoparticles on lipopolysaccharide-induced anxiety behavior in adult mice.** B6SJLF1/J adult mice (5-10 months old) were pretreated with intranasal dantrolene nanoparticles (Dan, 5mg/kg) or vehicle (Veh) control daily, Monday to Friday, for continuous 4 weeks. Mice were then treated with one-time IP injection of lipopolysaccharide (LPS, 5 mg/kg). Mice in control (No Tx) group received no treatments. Open field test (OFT) was performed at 24 hours after one-time IP LPS injection. The less central zone distance or less mean speed, the more anxiety behavior for OFT. N=18-20 mice. Means±95%CI, One-Way ANOVA followed by Tukey post hoc test. \*\*\*P<0.001.

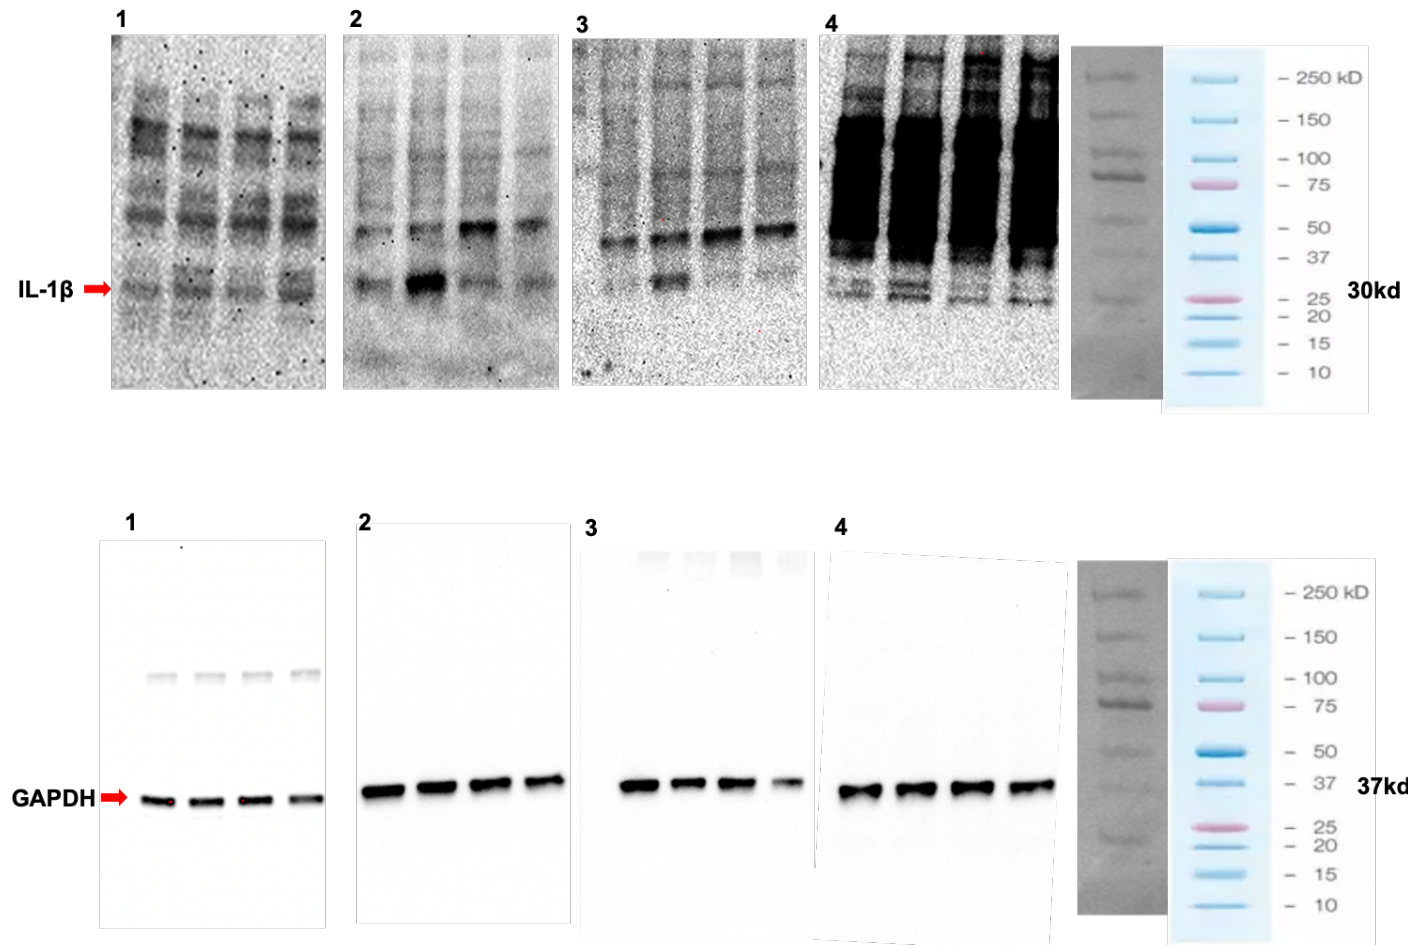

**Supplemental figure 3.** The uncropped images of the original western blots in figure 3C. Repeated from 4 individual groups.

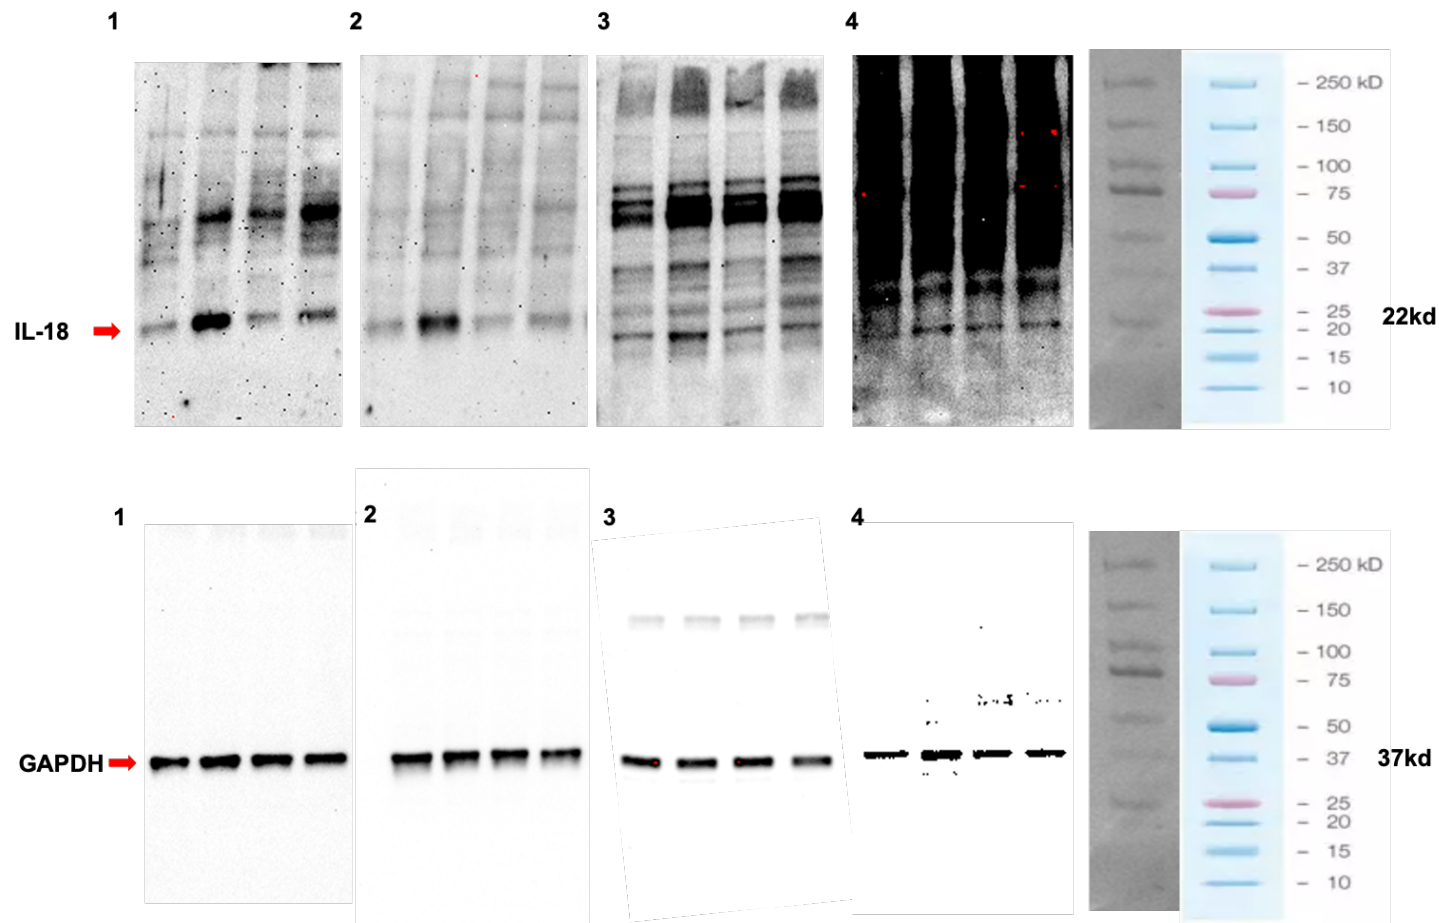

**Supplemental figure 4** The uncropped images of the original western blots in figure 3D. Repeated from 4 individual groups.

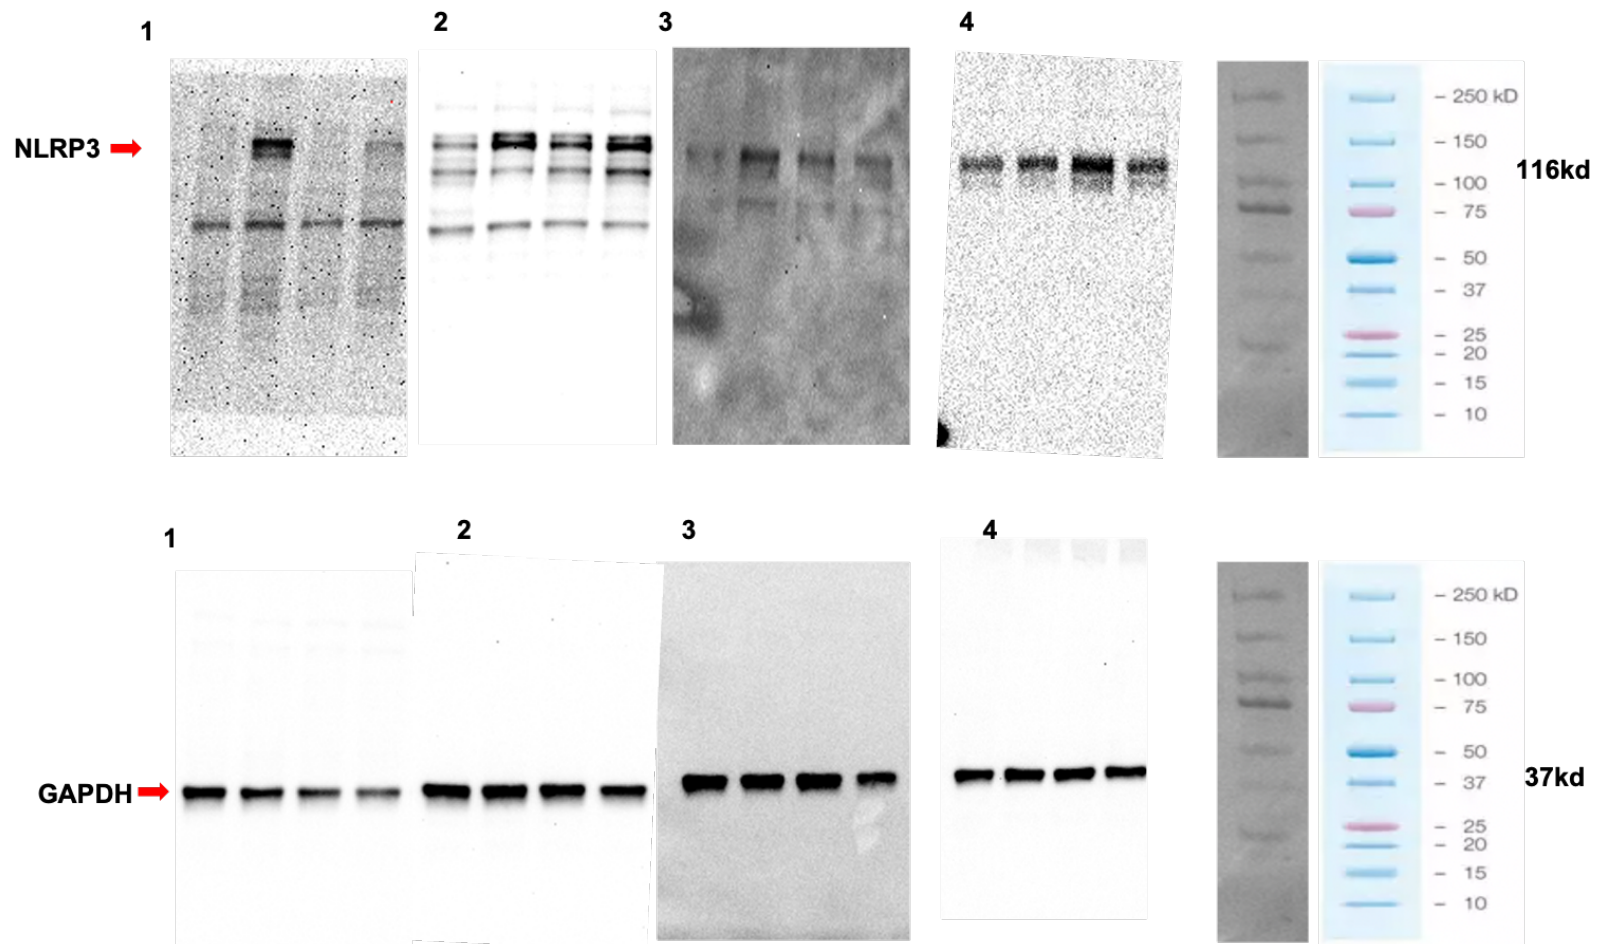

**Supplemental figure 5.** The uncropped images of the original western blots in figure 4A. Repeated from 4 individual groups.

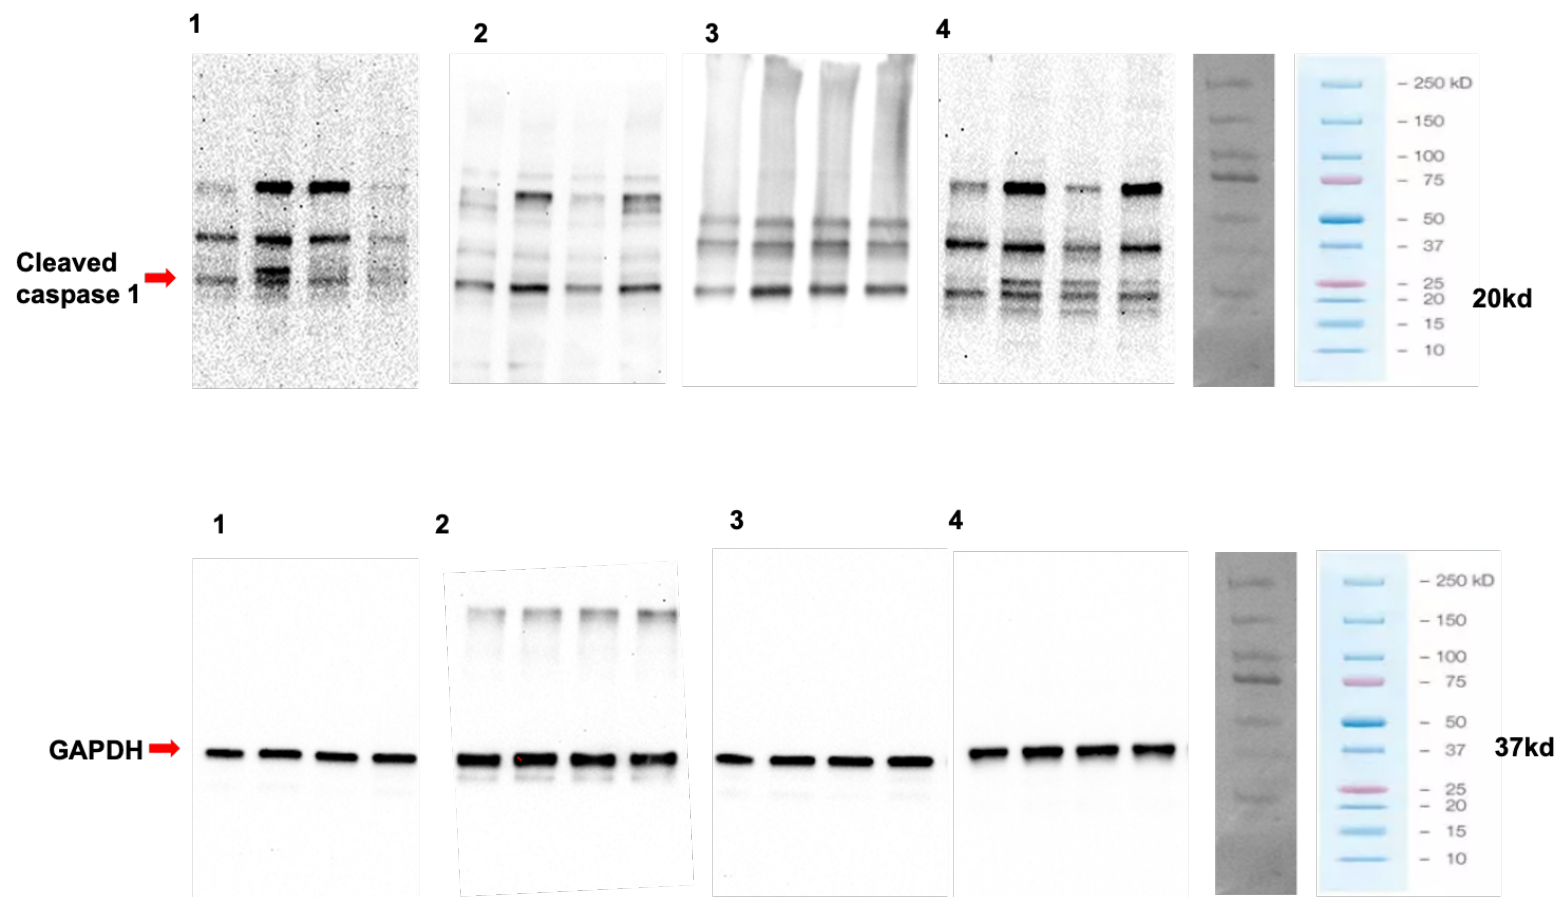

**Supplemental figure 6.** The uncropped images of the original western blots in figure 4B. Repeated from 4 individual groups.



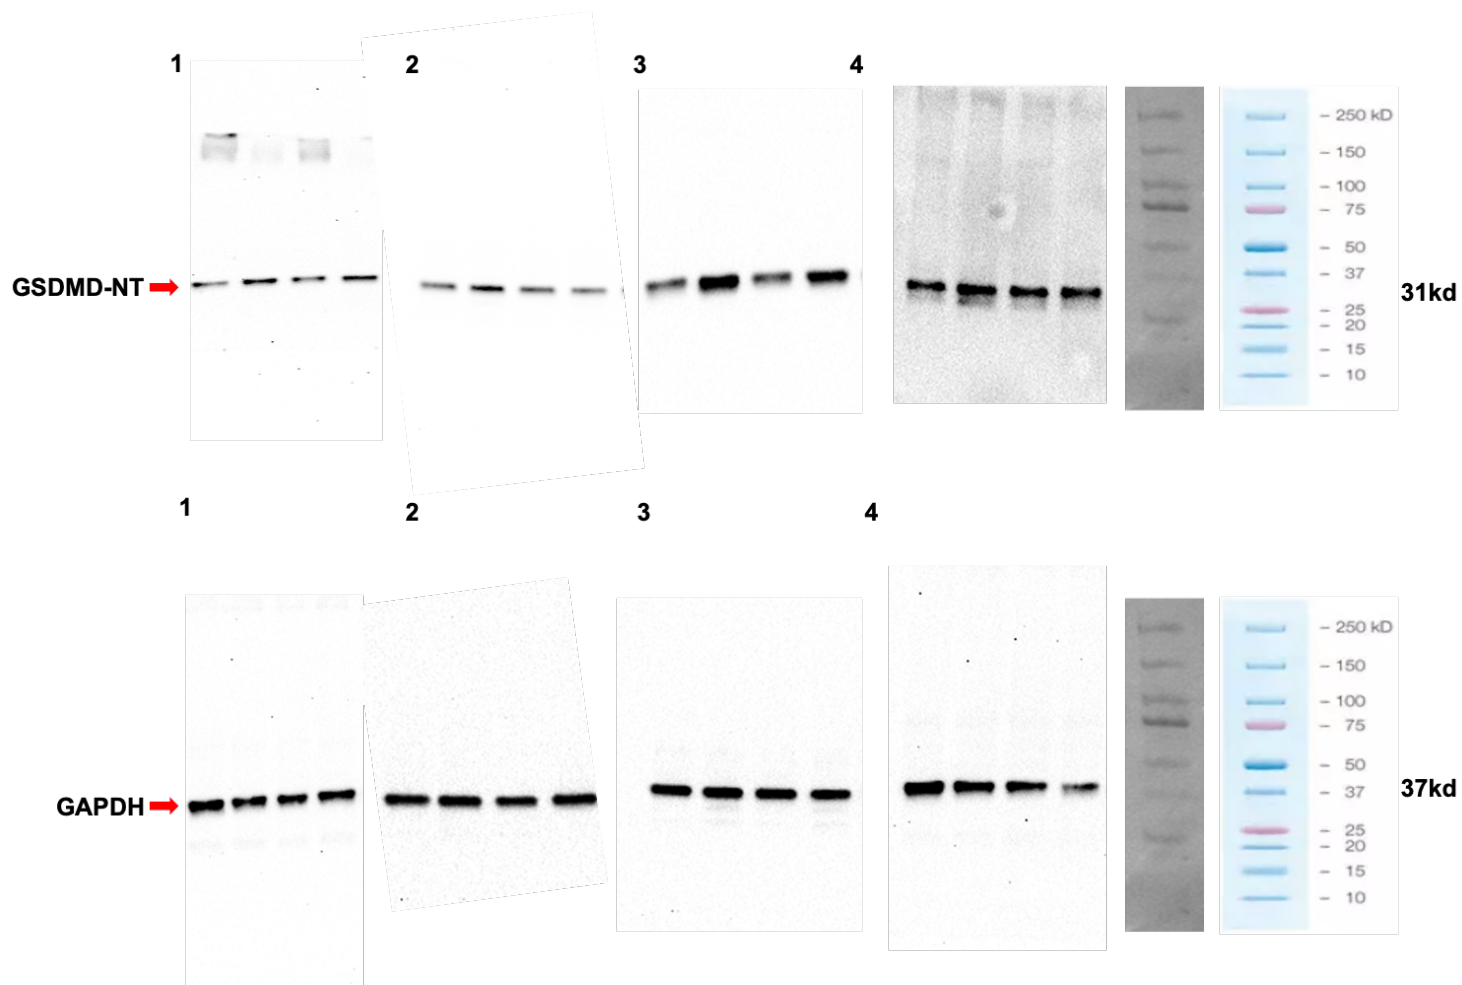

**Supplemental figure 7.** The uncropped images of the original western blots in figure 4C. Repeated from 4 individual groups.

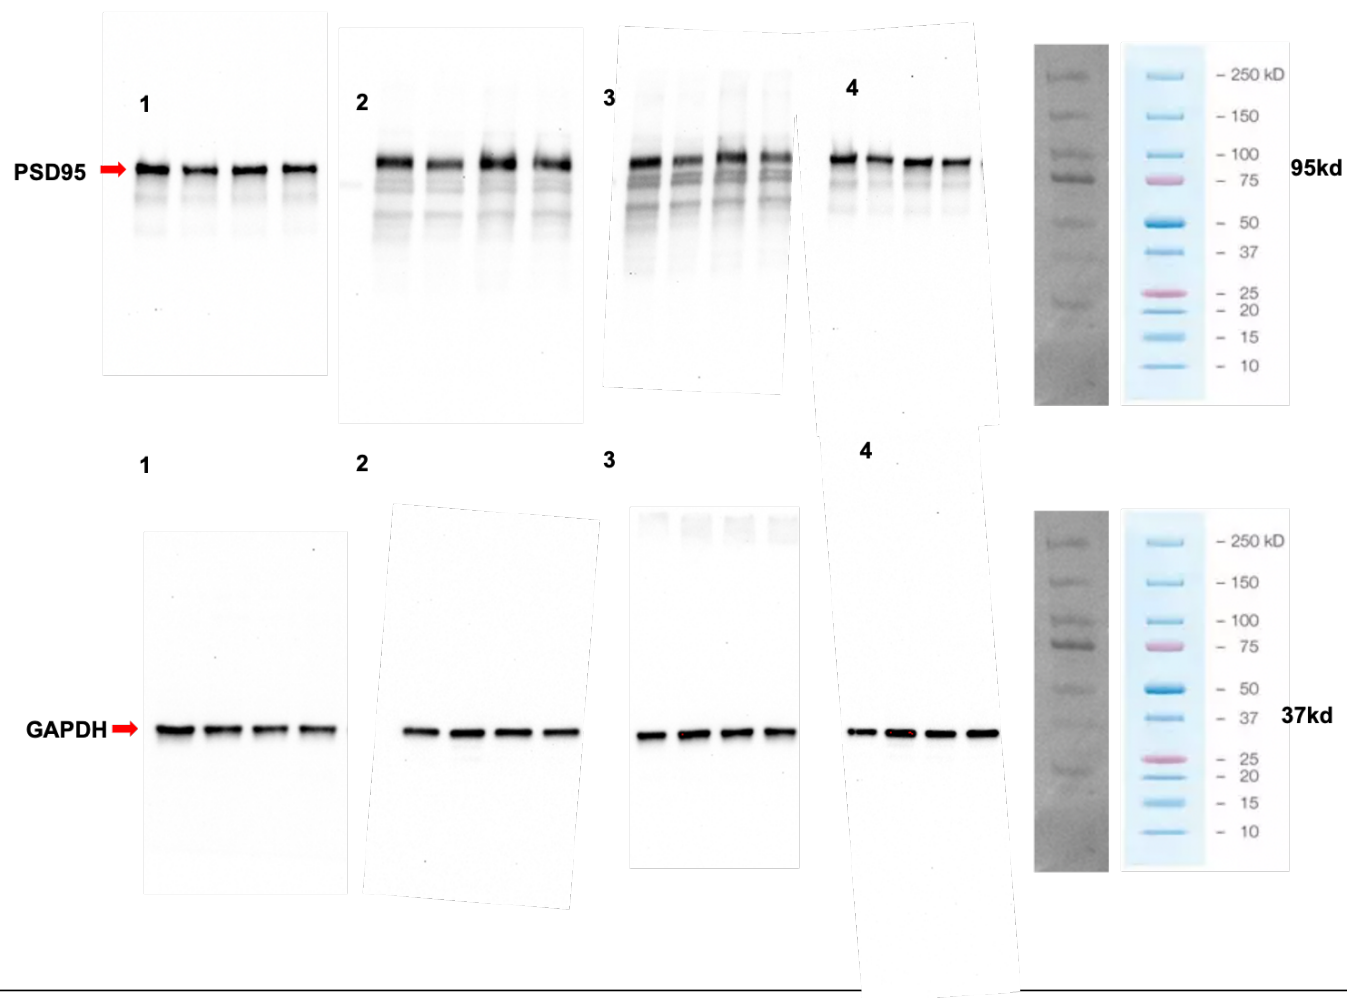

**Supplemental figure 8.** The uncropped images of the original western blots in figure 5A. Repeated from 4 individual groups.



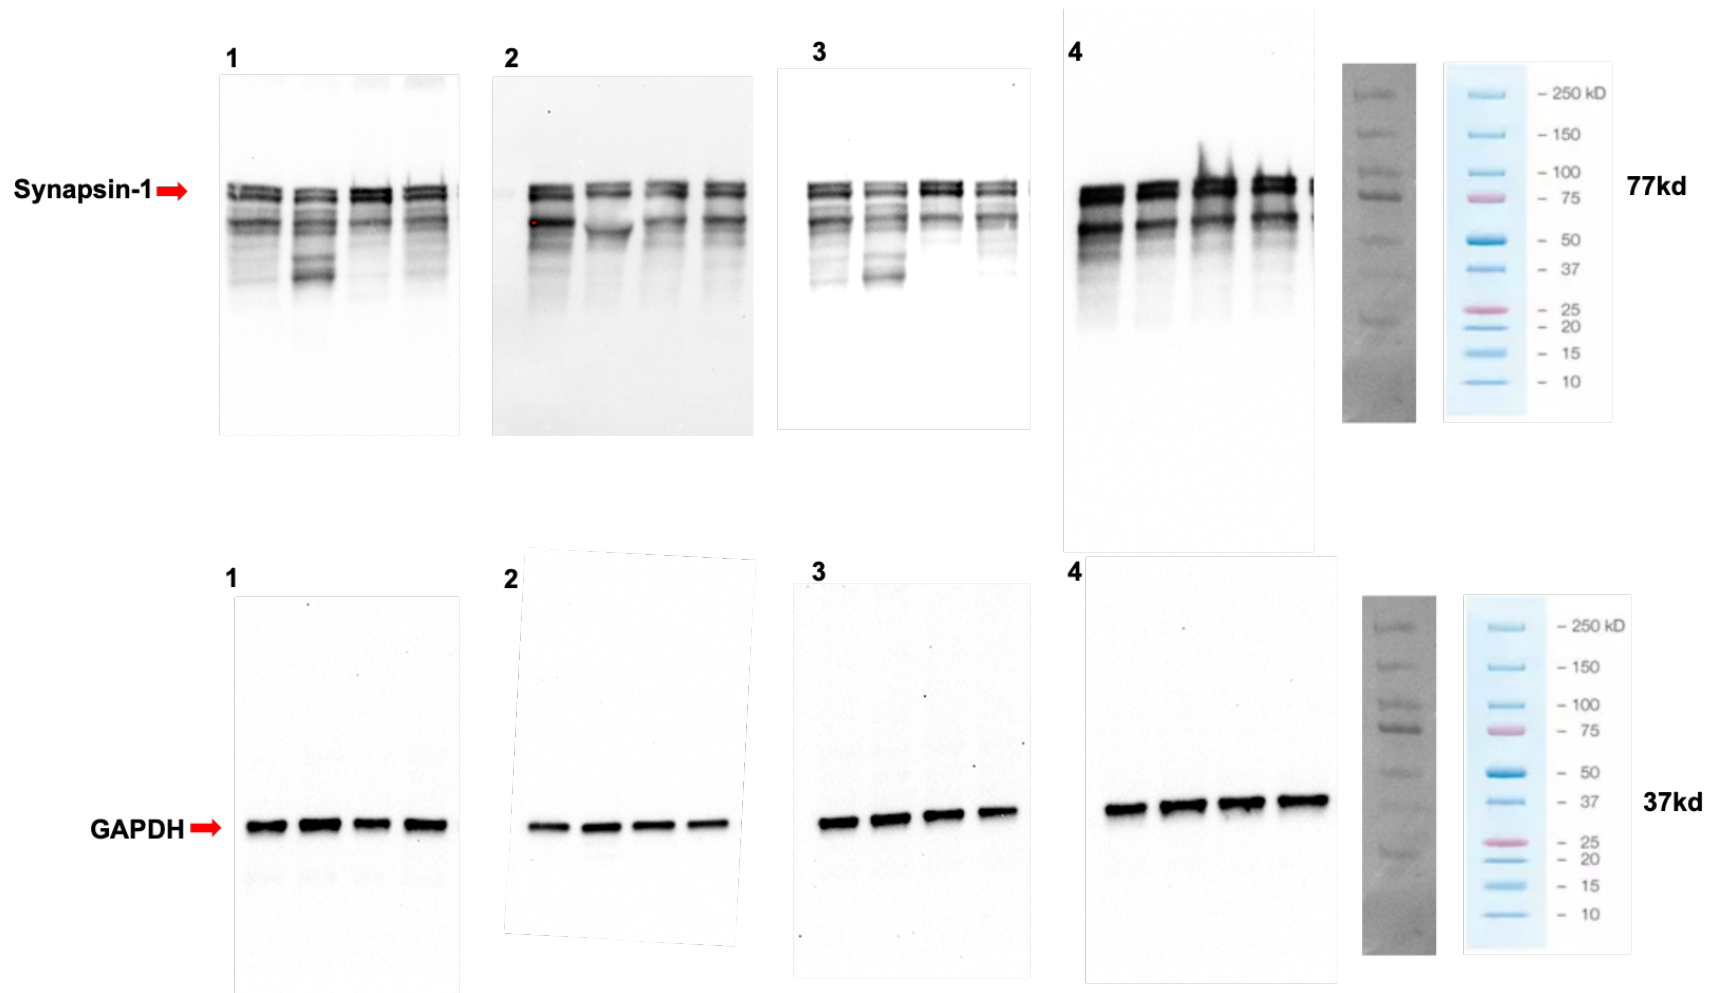

**Supplemental figure 9.** The uncropped images of the original western blots in figure 5B. Repeated from 4 individual groups.

| Table 1                                           | Cat. and Manufacture                       | Dilution |
|---------------------------------------------------|--------------------------------------------|----------|
| Primary antibody                                  |                                            |          |
| Anti- NLRP3                                       | 68102-1-Ig; Proteintech                    | 1:2000   |
| Anti-Human procaspase-1/<br>cleaved caspase-1 p20 | #2225S, Cell signaling<br>Technology, USA  | 1:1000   |
| Anti- Cleaved GSDMD                               | #36425S; Cell signaling<br>Technology, USA | 1:1000   |
| Anti-IL-1 $\beta$                                 | 31202S, Cell signaling<br>Technology, USA  | 1:1000   |
| Anti-IL-18                                        | 10663-1-AP; Proteintech                    | 1:3000   |
| Anti-PSD95                                        | #2507; Cell signaling<br>Technology, USA   | 1:1000   |
| Anti-Synapsin-1                                   | #5297; Cell signaling<br>Technology, USA   | 1:1000   |
| GAPDH                                             | MA5–15738, Thermo Fisher<br>Scientific     | 1:10,000 |
| Secondary antibody                                |                                            |          |
| Anti-Mouse IgG1; HRP<br>-linked                   | # PA1-74421, Thermo Fisher<br>Scientific   | 1:10,000 |
| Anti-rabbit IgG, HRP-linked                       | #7074; Cell signaling<br>Technology, USA   | 1:1000   |
